# Supplementary material for: Porous single crystal microcubes of niobium nitride for highly efficient electrocatalysis
Source: Royal Society of Chemistry journal article supplement (doi:10.1039/d3nj05158g), 2024-01-01
Supplement: d3nj05158g1.pdf [file d3nj05158g1.pdf]

## Supporting information

### **Porous single crystal microcubes of niobium nitride for highly efficient electrocatalysis**

Xuehua Li <sup>a, c</sup>, Cong Luo <sup>b, c</sup>, Guoming Lin <sup>\*c, d</sup>, Shaobo Xi <sup>\*c, d</sup> and Kui Xie <sup>\*c, d</sup>

<sup>a</sup> College of Chemistry and Materials Science, Fujian Normal University, Fuzhou 350007, China

<sup>b</sup> College of Physics and Energy, Fujian Normal University, Fuzhou 350117, China

<sup>c</sup> Key Laboratory of Design & Assembly of Functional Nanostructures, Fujian Institute of Research on the Structure of Matter, Chinese Academy of Sciences, Fuzhou 350002, China

<sup>d</sup> Advanced Energy Science and Technology Guangdong Laboratory, 29 Sanxin North Road, Huizhou 116023, China

Corresponding Authors

E-mail: [linguoming@fjirsm.ac.cn](mailto:linguoming@fjirsm.ac.cn)

E-mail: [xishaobo@fjirsm.ac.cn](mailto:xishaobo@fjirsm.ac.cn)

E-mail: [kxie@fjirsm.ac.cn](mailto:kxie@fjirsm.ac.cn)

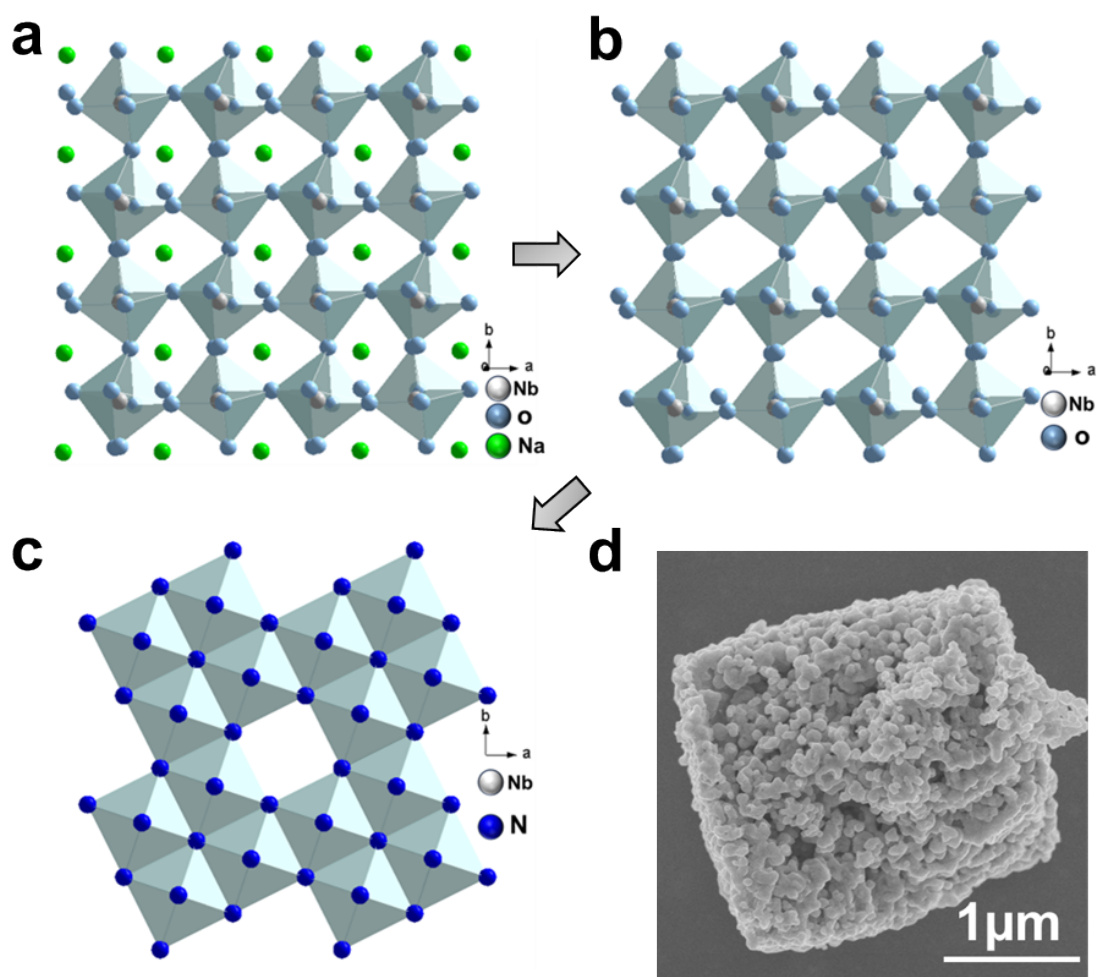

**Fig. S1** (a) The lattice channel of atomic evaporation of the (100) facet of NaNbO<sub>3</sub> substrates. (b) (100) orientation of NaNbO<sub>3</sub> single crystal after evaporation of Na atoms. (c) (001) orientation of PSC Nb<sub>4</sub>N<sub>5</sub> monoliths (Na atoms are green, O atoms are gray, Nb atoms are white, N atoms are blue). (d) SEM image of PPC Nb<sub>4</sub>N<sub>5</sub>

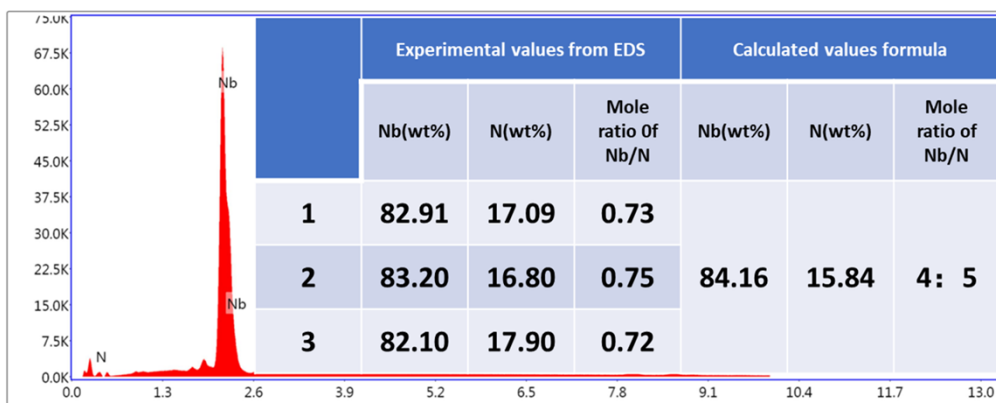

**Fig. S2** The element analysis of PSC Nb<sub>4</sub>N<sub>5</sub>. No oxygen residual is observed from EDS elemental analysis. The mole ratio between Nb and N is approximately at 4:5.

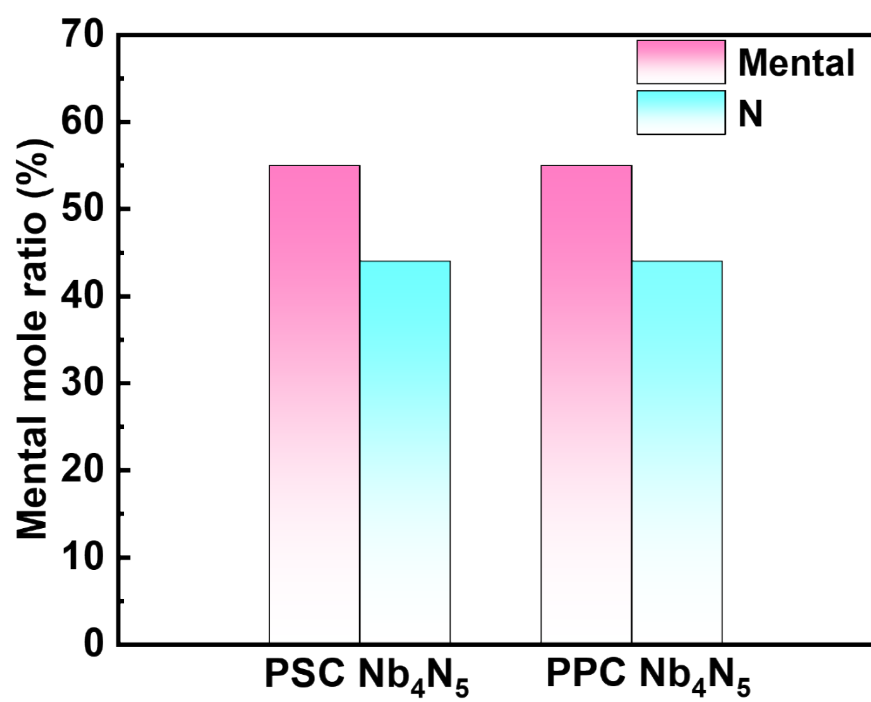

**Fig. S3** ICP and CA results. Mole ratio between metal and nitrogen in PSC Nb<sub>4</sub>N<sub>5</sub> and PPC Nb<sub>4</sub>N<sub>5</sub>.

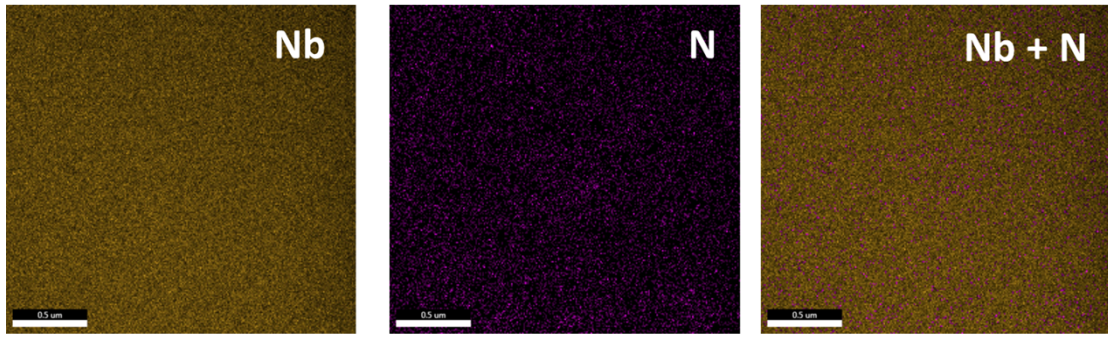

**Fig. S4** EDS mapping images of PSC Nb<sub>4</sub>N<sub>5</sub>.

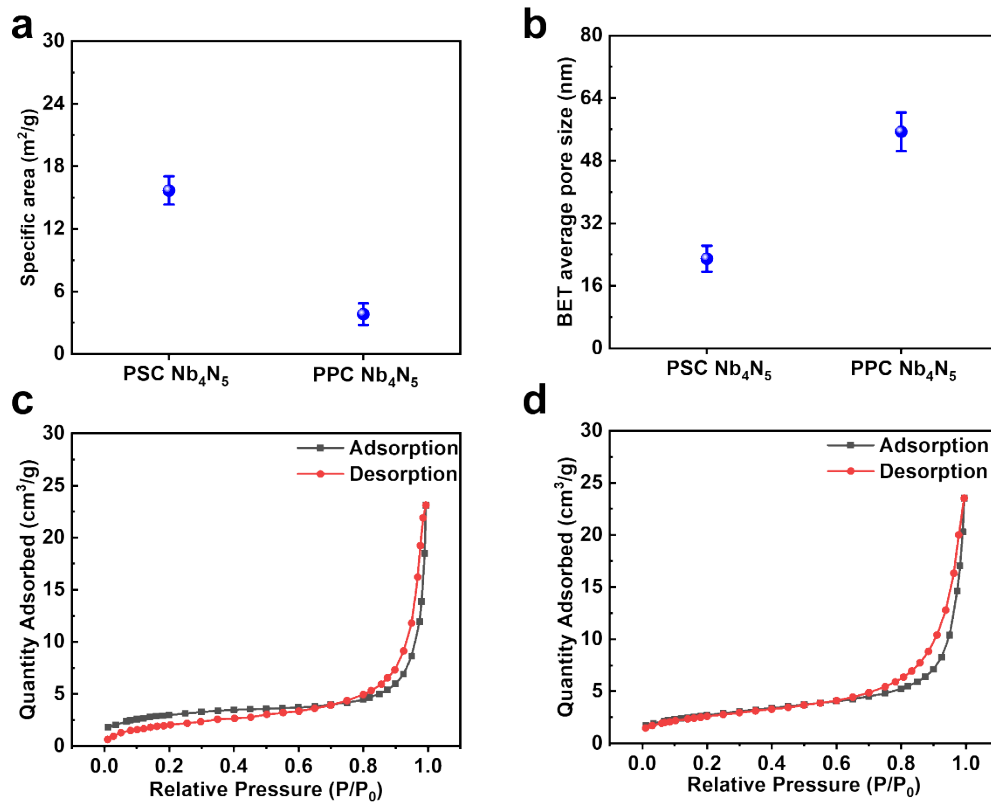

**Fig. S5** (a, b) The surface specific area and BET average pore size of PSC Nb<sub>4</sub>N<sub>5</sub> and PPC Nb<sub>4</sub>N<sub>5</sub>. (c) Nitrogen adsorption-desorption isotherm of PSC Nb<sub>4</sub>N<sub>5</sub>. (d) Nitrogen adsorption-desorption isotherm of PPC Nb<sub>4</sub>N<sub>5</sub>.

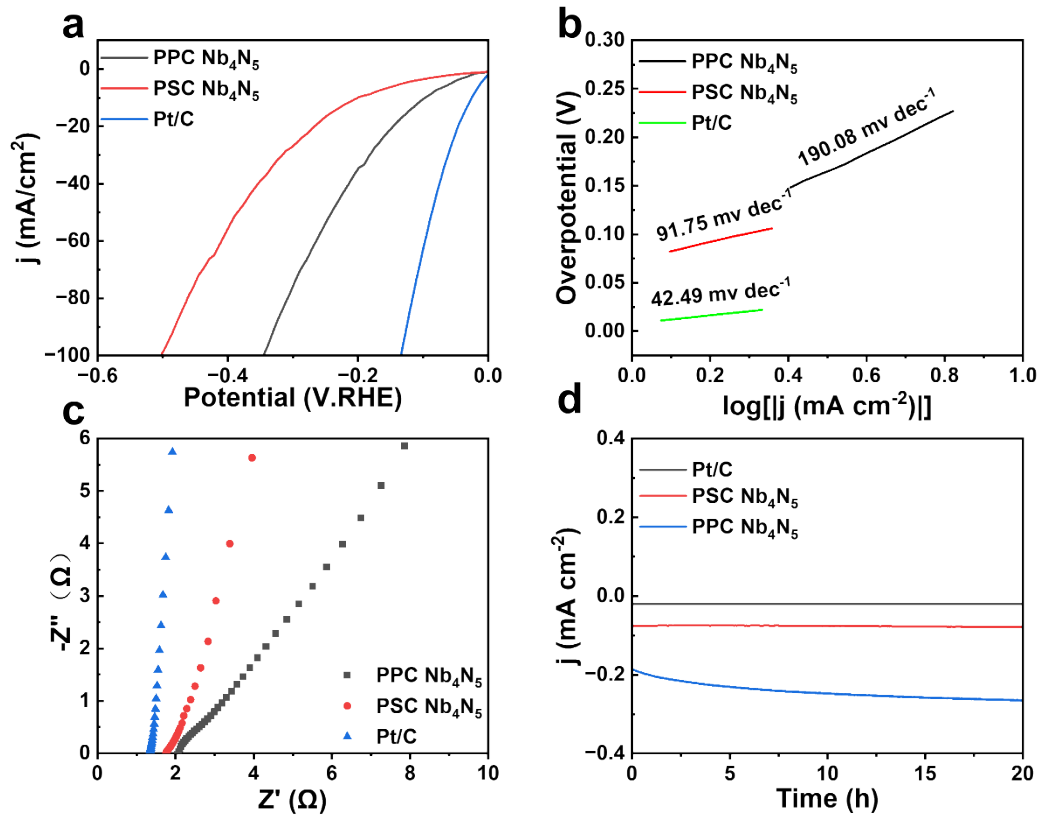

**Fig. S6** (a) LSV curves of PSC Nb<sub>4</sub>N<sub>5</sub>, PPC Nb<sub>4</sub>N<sub>5</sub> and Pt/C in 1 M KOH solution with a scan rate 5 mV s<sup>-1</sup>. (b) Tafel slope of PSC Nb<sub>4</sub>N<sub>5</sub>, PPC Nb<sub>4</sub>N<sub>5</sub> and Pt/C. (c) Nyquist plots of PSC Nb<sub>4</sub>N<sub>5</sub>, PPC Nb<sub>4</sub>N<sub>5</sub> and Pt/C. (d) The durability test of PSC Nb<sub>4</sub>N<sub>5</sub>, PPC Nb<sub>4</sub>N<sub>5</sub> and Pt/C for 20 h.

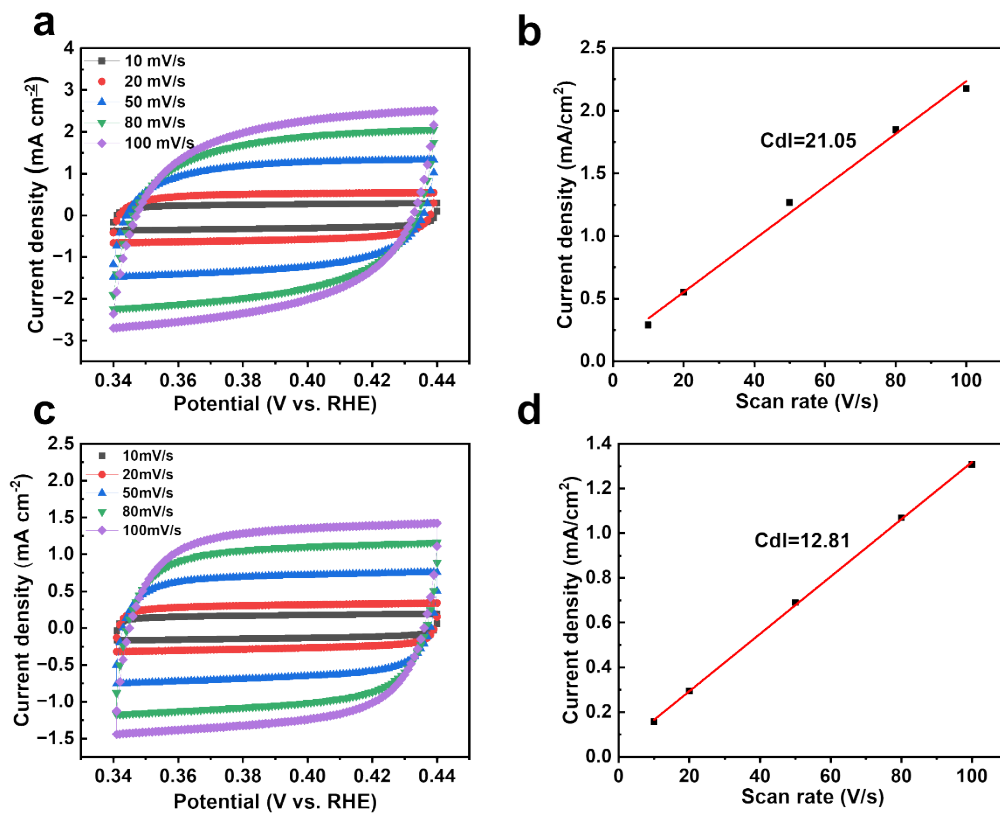

**Fig. S7** CVs of (a) PSC Nb<sub>4</sub>N<sub>5</sub> and (c) PPC Nb<sub>4</sub>N<sub>5</sub> hexahedron catalysts at 10-100 mV s<sup>-1</sup> in 0.5 M H<sub>2</sub>SO<sub>4</sub> solution; (b) Plots providing the C<sub>dl</sub> value of PSC Nb<sub>4</sub>N<sub>5</sub> catalyst. (d) Plots providing the C<sub>dl</sub> value of PPC Nb<sub>4</sub>N<sub>5</sub> catalyst.



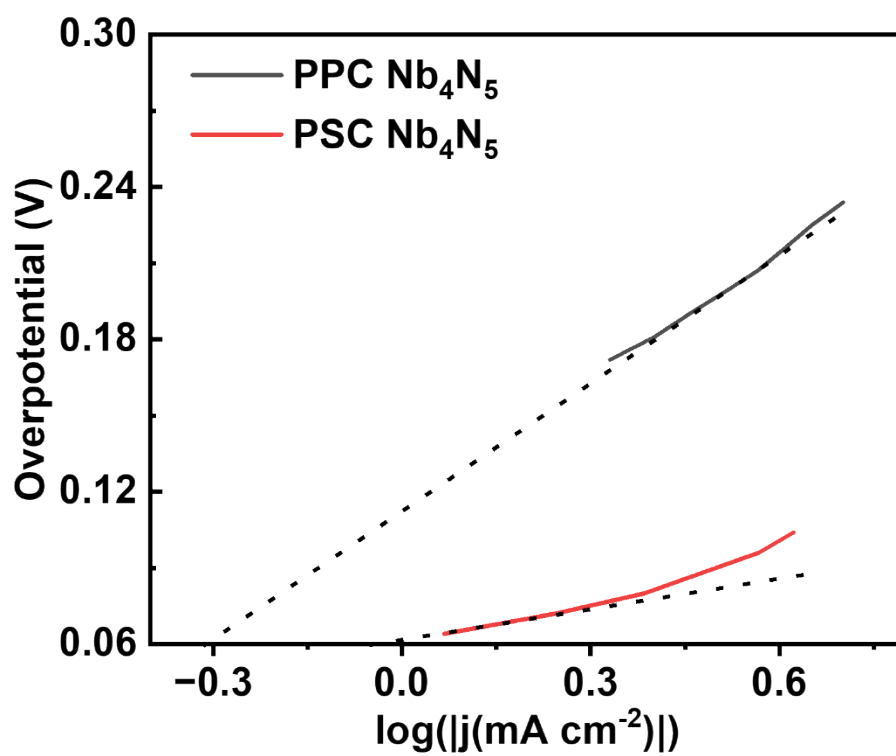

**Fig. S8** Calculated exchange current densities of the PSC Nb<sub>4</sub>N<sub>5</sub> and PPC Nb<sub>4</sub>N<sub>5</sub> in 0.5 M H<sub>2</sub>SO<sub>4</sub> electrolyte by applying extrapolation method to the Tafel plots.

**Table S1.** The comparison of HER electrocatalytic performance.

| Catalyst                               | $\eta$ (mV)at<br>$j=10\text{mA cm}^{-2}$ | Tafel slope                 | Electrolyte                          | references |
|----------------------------------------|------------------------------------------|-----------------------------|--------------------------------------|------------|
| PSC Nb <sub>4</sub> N <sub>5</sub>     | 71.86 mV                                 | 70.26 mV dec <sup>-1</sup>  | 0.5 M H <sub>2</sub> SO <sub>4</sub> | This work  |
| PPC Nb <sub>4</sub> N <sub>5</sub>     | 191.51 mV                                | 169.02 mV dec <sup>-1</sup> | 0.5 M H <sub>2</sub> SO <sub>4</sub> | This work  |
| Nb <sub>2</sub> N                      | 96.3 mV                                  | 92 mV dec <sup>-1</sup>     | 0.5 M H <sub>2</sub> SO <sub>4</sub> | [1]        |
| Sr <sub>2</sub> RuO <sub>4</sub>       | 61 mV                                    | 51 mV dec <sup>-1</sup>     | 1 M KOH                              | [2]        |
| Nb <sub>4</sub> N <sub>5</sub> -xOx/NG | 39 mV                                    | 79 mV dec <sup>-1</sup>     | 0.5 M H <sub>2</sub> SO <sub>4</sub> | [3]        |
| PSC Mo <sub>2</sub> N                  | 73.13 mV                                 | 66.52 mV dec <sup>-1</sup>  | 1 M KOH                              | [4]        |
| PSC VN                                 | 74.67 mV                                 | 68.30 mV dec <sup>-1</sup>  | 1 M KOH                              | [5]        |
| Nb-Ti NNA                              | 120 mV                                   | 52.90 mV dec <sup>-1</sup>  | 1 M KOH                              | [6]        |
| Co-NG                                  | 30 mV                                    | 82 mV dec <sup>-1</sup>     | 0.5 M H <sub>2</sub> SO <sub>4</sub> | [7]        |
| C-MoS <sub>2</sub>                     | 45 mV                                    | 46 mV dec <sup>-1</sup>     | 1 M KOH                              | [8]        |
| NiN                                    | 210 mV                                   | 122 mV dec <sup>-1</sup>    | 1 M KOH                              | [9]        |

#### References

- 1 Y. Li, J. Zhang, X. Qian, Y. Zhang, Y. Wang, R. Hu, C. Yao and J. Zhu, *Applied Surface Science*, 2018, **427**, 884-889.
- 2 Y. Zhu, H. A. Tahini, Z. Hu, J. Dai, Y. Chen, H. Sun, W. Zhou, M. Liu, S. C. Smith, H. Wang and Z. Shao, *Nature Communications*, 2019, **10**, 149.
- 3 Y. Yang, Y. Wang, H.-L. He, W. Yan, L. Fang, Y.-B. Zhang, Y. Qin, R. Long, X.-M. Zhang and X. Fan, *ACS Nano*, 2020, **14**, 4925-4937.
- 4 S. Yunqi, L. Jiaming, L. Guoming and X. Kui, *International Journal of Hydrogen Energy*, 2021, **46**, 21777-21784.
- 5 X. Yu, F. Cheng and K. Xie, *New Journal of Chemistry*, 2022, **46**, 1392-1398.
- 6 H. Zhang, X. Chen, Z. Lin, L. Zhang, H. Cao, L. Yu and G. Zheng, *International Journal of Hydrogen Energy*, 2020, **45**, 6461-6475.
- 7 H. Fei, J. Dong, M. J. Arellano-Jiménez, G. Ye, N. Dong Kim, E. L. G. Samuel, Z. Peng, Z. Zhu, F. Qin, J. Bao, M. J. Yacaman, P. M. Ajayan, D. Chen and J. M. Tour, *Nature Communications*, 2015, **6**, 8668.
- 8 Y. Zang, S. Niu, Y. Wu, X. Zheng, J. Cai, J. Ye, Y. Xie, Y. Liu, J. Zhou, J. Zhu, X. Liu, G. Wang and Y. Qian, *Nature Communications*, 2019, **10**, 1217.
- 9 W. Hua, H. Sun, H. Liu, Y. Li and J.-G. Wang, *Applied Surface Science*, 2021, **540**, 148407.
